# Supplementary figures and images for: Retinal Vascular Measurements and Mortality Risk: Evidence From the UK Biobank Study
Source: PubMed Central journal article supplement — Transl Vis Sci Technol. 2024 Jan 2;13(1):2. doi: 10.1167/tvst.13.1.2 (PMC10773151; doi:10.1167/tvst.13.1.2), 2024-01-02

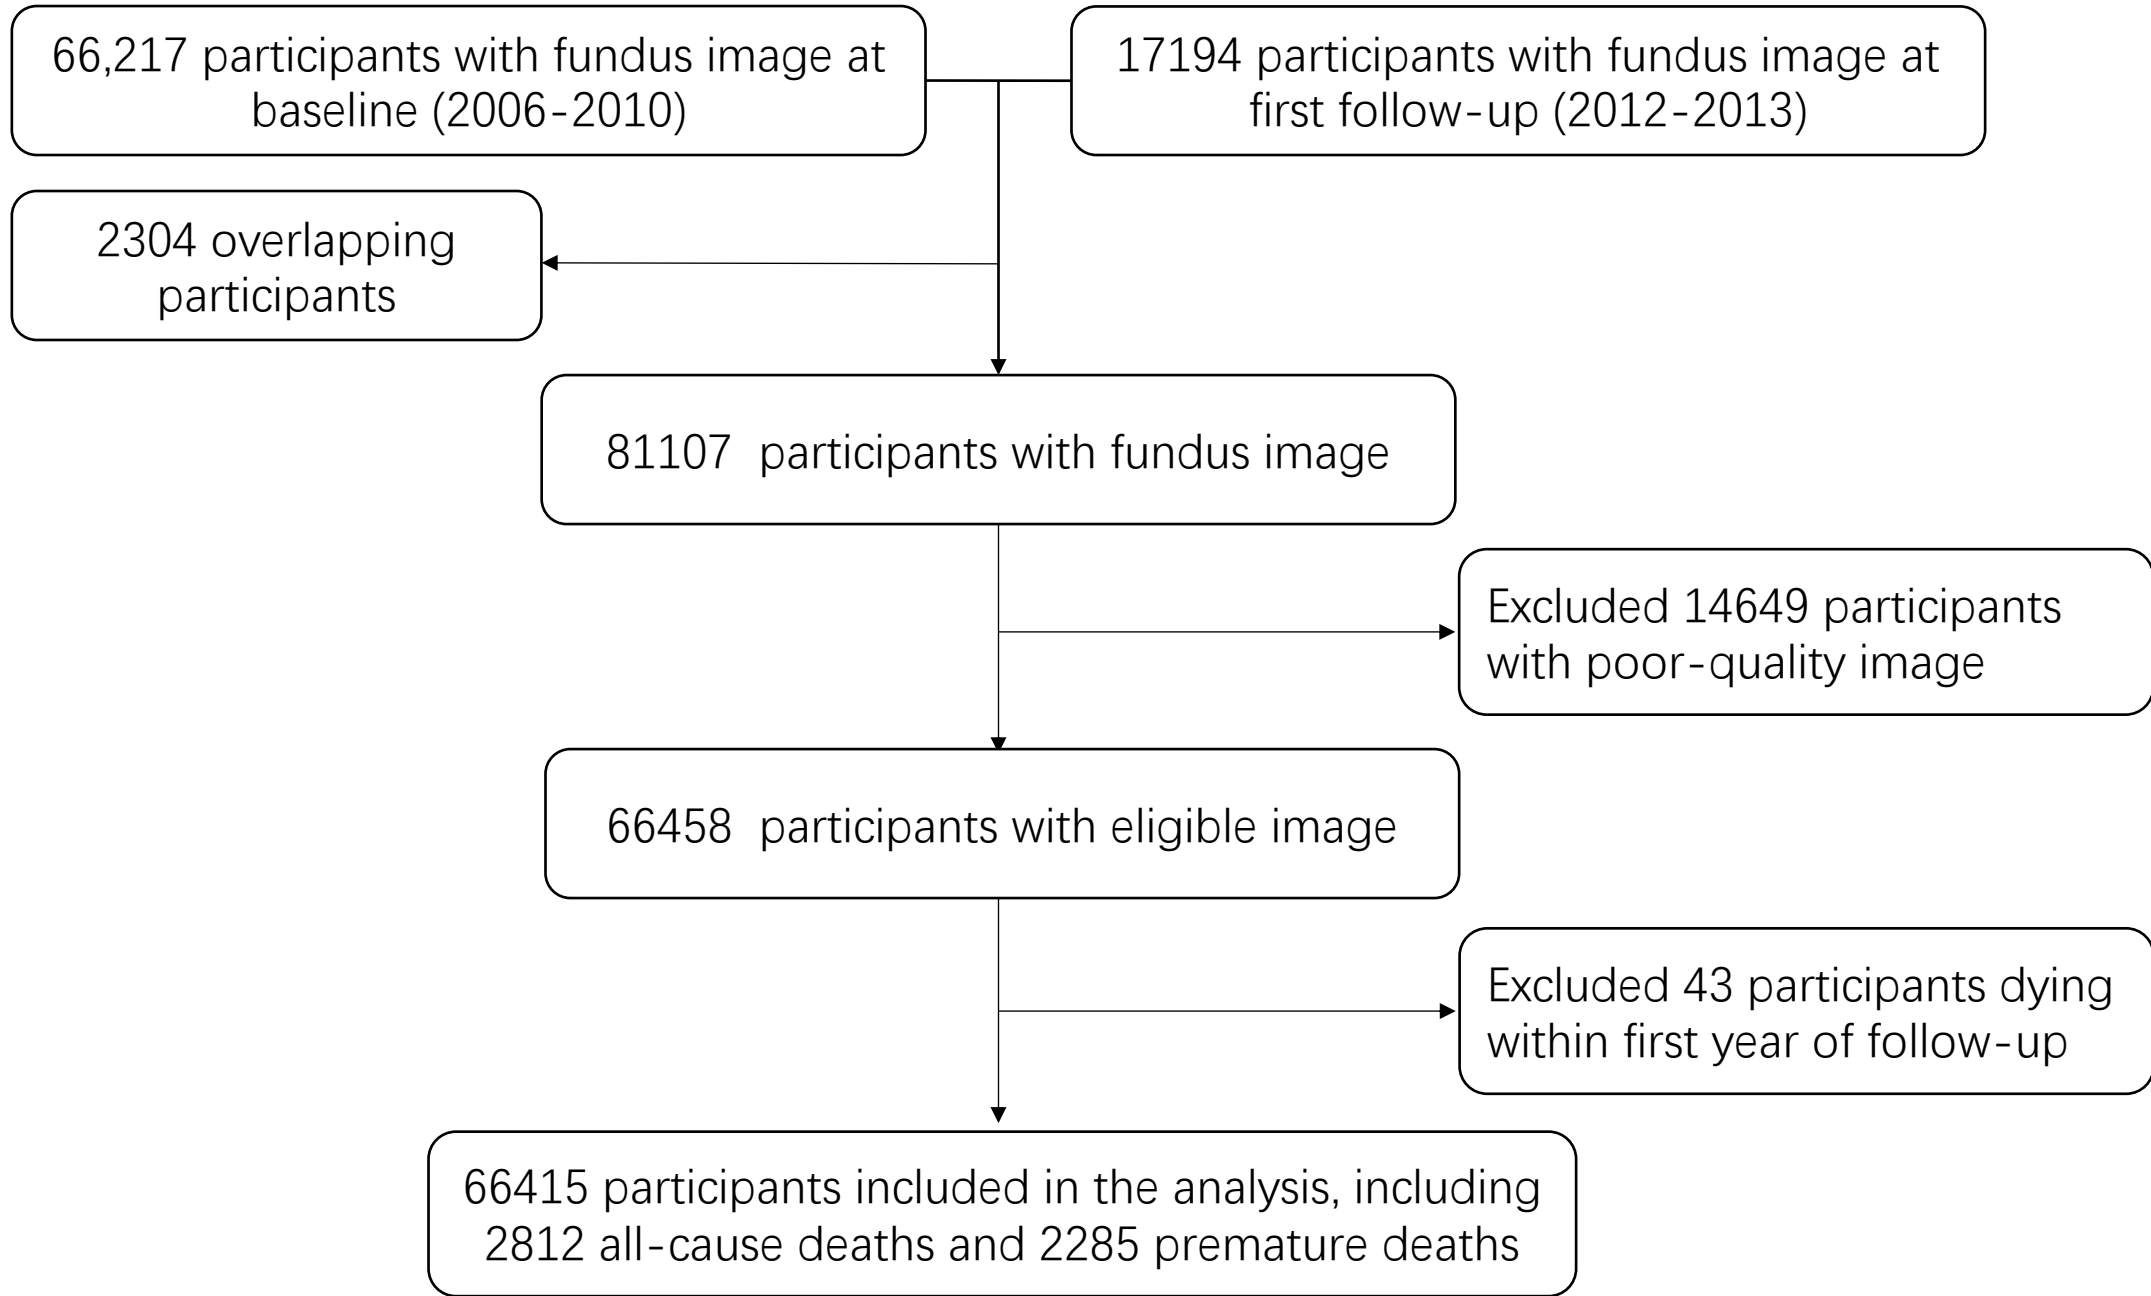

Supplementary Figure 1. Enrollment flowchart

Supplement: tvst-13-1-2_s001.pdf [file tvst-13-1-2_s001.pdf]
